# Supplementary material
Source: Elsevier journal article supplement (https://www.sciencedirect.com/science/article/pii/S0092867418312558)
Supplement: mmc3 [file 1-s2.0-S0092867418312558-mmc3.pdf]

**Table S3. Validation of VM-ERV candidates – Related to STAR Methods**

| <b>ERV coordinates</b>    | <b>ERV class</b> | <b>Experimental variation</b> |
|---------------------------|------------------|-------------------------------|
| chr4:134159390-134164702  | ERV1             | 24.00667                      |
| chr11:50445185-50448338   | ERVK             | 19.77667                      |
| chr17:87825643-87826512   | ERVK             | 16.93467                      |
| chr9:119768870-119769617  | ERVL             | 15.22333                      |
| chr18:30266511-30272200   | ERV1             | 14.86                         |
| chr5:89203776-89209330    | ERVK             | 14.28778                      |
| chr8:14878801-14879350    | ERVK             | 14.09889                      |
| chr17:80562592-80564295   | ERVK             | 13.21778                      |
| chr12:73551335-73551655   | ERVK             | 12.882                        |
| chr10:127890018-127890535 | ERVK             | 11.88333                      |
| chr19:61199870-61200383   | ERV1             | 11.79667                      |
| chr15:55871468-55877005   | ERVK             | 11.08875                      |
| chr5:92357515-92358372    | ERV1             | 11.01333                      |
| chr17:14094391-14099888   | ERVK             | 9.892222                      |
| chr7:49752788-49752997    | ERVL             | 9.565833                      |
| chr6:108708205-108708524  | ERVK             | 8.795                         |
| chr1:167637978-167638332  | ERVL             | 8.598889                      |
| chr1:134400075-134405591  | ERVK             | 8.3605                        |
| chr8:4799593-4800785      | ERV1             | 7.935                         |
| chr8:105499850-105500332  | ERVL             | 7.896667                      |
| chr8:119889564-119897040  | ERV1             | 7.4975                        |
| chr17:87877890-87878685   | ERVL             | 7.489167                      |
| chr16:17554302-17555119   | ERVK             | 6.620833                      |
| chr17:32369421-32376516   | ERVK             | 6.611111                      |
| chr8:35109846-35110151    | ERVL             | 6.454667                      |
| chr18:61215716-61216076   | ERVL             | 6.312222                      |
| chr16:94066286-94066593   | ERVL             | 6.2075                        |
| chr17:87877890-87878685   | ERVL             | 5.36                          |
| chr8:114391107-114398258  | ERVK             | 5.326667                      |
| chr1:89096764-89102314    | ERVK             | 5.292                         |
| chr4:126625495-126626267  | ERVK             | 5.098889                      |
| chr5:114879784-114882457  | ERVK             | 5.072708                      |
| chr11:117174448-117174893 | ERVK             | 4.914167                      |
| chr6:85965716-85966239    | ERV1             | 4.45875                       |
| chr9:78521525-78522134    | ERV1             | 4.078333                      |
| chr2:178604020-178604661  | ERV1             | 3.736667                      |
| chr11:86811741-86816399   | ERV1             | 3.661875                      |
| chr9:68801476-68801953    | ERVK             | 3.283333                      |
| chr12:58306552-58307085   | ERVK             | 3.133333                      |
| chr6:87119268-87119744    | ERVK             | 2.969259                      |
| chr19:44254266-44254775   | ERV1             | 2.813                         |
| chr16:87665081-87665615   | ERV1             | 2.765333                      |
| chr18:49551002-49551504   | ERVK             | 2.48                          |
| chr1:191896787-191897062  | ERVL             | 1.941111                      |

**Table S4. Q-PCR primers – Related to STAR Methods**

|                | <b>Forward Primer</b>  | <b>Reverse primer</b>  |
|----------------|------------------------|------------------------|
| Eps8l1_ex12    | GAGTCCTCAGGCACCTCC     | ACTTTGCACTTGGTTTGGGT   |
| Eps8l1_ex45    | TGTCAATCACCTGGTCACCT   | TCAGTAGCATCTCCTGTGCC   |
| Slc15a2_ex12   | TGAGTCCAAGGAAACGCTCT   | GAAGAGCTTCGGAGTTGACT   |
| Slc15a2_ex57   | TGAAGAGGAACATGCAGAGG   | GCATAGCAGTCTTCGCCAAA   |
| Slc15a2_ex910  | GCTTCAGGAACCGTTCTGAG   | CGTCCATAATGAGGTGCTTTGG |
| Slc15a2_ex1920 | GCAGTGCATTGTGAAACGGA   | CCCCGGTTGGTGATATTAGTG  |
| 2610035D17Rik  | CCCAACAGTCACCCATCCAT   | GTCTCCTCGGCCTTTCTCTT   |
| Bmf            | CCAGAGACTCTTTTACGGCAAC | TGTTGCGTATGAAGCCGATG   |
| Bub1b          | GTCTCTGGATCAAATTGGGACA | CCTTGC GTTCAATCCCTTCC  |

**Table S6. ENCODE datasets – Related to STAR Methods**

| Experiment  | BigWig file | Bed file    | Target   | Tissue                       |
|-------------|-------------|-------------|----------|------------------------------|
| ENCSR000CBJ | ENCFF594EHQ | ENCFF258WBW | CTCF     | kidney male adult (8 weeks)  |
| ENCSR000CCB | ENCFF069PTO | ENCFF520LES | CTCF     | ES-Bruce4                    |
| ENCSR000CBU | ENCFF691VDG | ENCFF371UBQ | CTCF     | liver male adult (8 weeks)   |
| ENCSR000CBV | ENCFF870YTE | ENCFF967TRS | CTCF     | lung male adult (8 weeks)    |
| ENCSR000CBI | ENCFF824BON | ENCFF447SUY | CTCF     | heart male adult (8 weeks)   |
| ENCSR677SIH | ENCFF571UHJ | ENCFF095TOF | CTCF     | lung embryo (14.5 days)      |
| ENCSR418SBY | ENCFF709NWF | ENCFF116ZIX | CTCF     | lung postnatal (0 days)      |
| ENCSR491NUM | ENCFF246CLY | ENCFF139WDG | CTCF     | heart postnatal (0 days)     |
| ENCSR143WOK | ENCFF349HWD | ENCFF694LLR | CTCF     | kidney postnatal (0 days)    |
| ENCSR985ZTV | ENCFF309UUX | ENCFF726SOK | CTCF     | midbrain postnatal (0 days)  |
| ENCSR150RGT | ENCFF665MXC | ENCFF636SDF | CTCF     | hindbrain postnatal (0 days) |
| ENCSR041SMK | ENCFF112EXI | ENCFF310FWM | CTCF     | liver postnatal (0 days)     |
| ENCSR677HXC | ENCFF323HFE | ENCFF779QUY | CTCF     | forebrain postnatal (0 days) |
| ENCSR397RHW | ENCFF900YUX | ENCFF449LBJ | CTCF     | liver embryo (14.5 days)     |
| ENCSR238ZCJ | ENCFF135WIS | -           | H3K9me3  | lung postnatal (0 days)      |
| ENCSR341XCL | ENCFF098ALU | -           | H3K9me3  | liver postnatal (0 days)     |
| ENCSR498EVD | ENCFF010BLJ | -           | H3K9me3  | kidney postnatal (0 days)    |
| ENCSR000CFZ | ENCFF872YDS | -           | H3K9me3  | ES-Bruce4                    |
| ENCSR000CBF | ENCFF016YZA | -           | H3K4me1  | ES-Bruce4                    |
| ENCSR308GFM | ENCFF182IJL | -           | H3K4me1  | liver postnatal (0 days)     |
| ENCSR674PZU | ENCFF233UNG | -           | H3K4me1  | kidney postnatal (0 days)    |
| ENCSR000CFN | ENCFF587RBP | -           | H3K27me3 | ES-Bruce4                    |
| ENCSR973UGS | ENCFF930GQD | -           | H3K27me3 | liver postnatal (0 days)     |
| ENCSR564JKR | ENCFF339BGN | -           | H3K27me3 | kidney postnatal (0 days)    |
| ENCSR000CFO | ENCFF202RDN | -           | H3K36me3 | ES-Bruce4                    |
| ENCSR656AMS | ENCFF229JQH | -           | H3K36me3 | liver postnatal (0 days)     |
| ENCSR362PBD | ENCFF147HVT | -           | H3K36me3 | kidney postnatal (0 days)    |
| ENCSR000CGS | ENCFF342SOW | -           | H3K9ac   | ES-Bruce4                    |
| ENCSR966RAG | ENCFF139ZOZ | -           | H3K9ac   | liver postnatal (0 days)     |
| ENCSR288OHO | ENCFF357TID | -           | H3K9ac   | kidney postnatal (0 days)    |
| ENCSR000CDE | ENCFF646XOT | -           | H3K27ac  | ES-Bruce4                    |
| ENCSR616TJM | ENCFF734CDU | -           | H3K27ac  | liver postnatal (0 days)     |
| ENCSR140YPL | ENCFF605ABI | -           | H3K27ac  | kidney postnatal (0 days)    |
| ENCSR000CBG | ENCFF611GSQ | -           | H3K4me3  | ES-Bruce4                    |
| ENCSR653AVN | ENCFF587FZP | -           | H3K4me3  | liver postnatal (0 days)     |
| ENCSR536ILV | ENCFF926CET | -           | H3K4me3  | kidney postnatal (0 days)    |
